# Supplementary material for: Multiplex Real-Time RT-PCR Assays for Detection and Differentiation of Porcine Enteric Coronaviruses
Source: MDPI journal article supplement (doi:10.3390/pathogens12081040), 2023-08-14
Supplement: s1 [file s1]

Supplementary Table S2

| Pathogen/Control                            | Duplex 1 |        | Duplex 2 |        | Duplex 3 |        | Triplex    |        |        |
|---------------------------------------------|----------|--------|----------|--------|----------|--------|------------|--------|--------|
|                                             | PEDV N   | PEDV S | TGEV N   | PEDV S | TGEV S   | PEDV S | PDCoV RdRp | TGEV N | PEDV N |
| Teschovirus                                 | No Ct    | No Ct  | No Ct    | No Ct  | No Ct    | No Ct  | No Ct      | No Ct  | No Ct  |
| Sapelovirus, TSV8                           | No Ct    | No Ct  | No Ct    | No Ct  | No Ct    | No Ct  | No Ct      | No Ct  | No Ct  |
| Enterovirus G                               | No Ct    | No Ct  | No Ct    | No Ct  | No Ct    | No Ct  | No Ct      | No Ct  | No Ct  |
| Porcine circovirus 2                        | No Ct    | No Ct  | No Ct    | No Ct  | No Ct    | No Ct  | No Ct      | No Ct  | No Ct  |
| Hepatitis E virus                           | No Ct    | No Ct  | No Ct    | No Ct  | No Ct    | No Ct  | No Ct      | No Ct  | No Ct  |
| <i>E. coli</i> , STb/LT                     | No Ct    | No Ct  | No Ct    | No Ct  | No Ct    | No Ct  | No Ct      | No Ct  | No Ct  |
| <i>E. coli</i> , STb                        | No Ct    | No Ct  | No Ct    | No Ct  | No Ct    | No Ct  | No Ct      | No Ct  | No Ct  |
| <i>E. coli</i> , STa/STb/LT                 | No Ct    | No Ct  | No Ct    | No Ct  | No Ct    | No Ct  | No Ct      | No Ct  | No Ct  |
| <i>E. coli</i> , O8 stx2e                   | No Ct    | No Ct  | No Ct    | No Ct  | No Ct    | No Ct  | No Ct      | No Ct  | No Ct  |
| <i>E. coli</i> , O8                         | No Ct    | No Ct  | No Ct    | No Ct  | No Ct    | No Ct  | No Ct      | No Ct  | No Ct  |
| <i>S. choleraesuis</i> / <i>S. enterica</i> | No Ct    | No Ct  | No Ct    | No Ct  | No Ct    | No Ct  | No Ct      | No Ct  | No Ct  |
| <i>Cl. difficile</i>                        | No Ct    | No Ct  | No Ct    | No Ct  | No Ct    | No Ct  | No Ct      | No Ct  | No Ct  |
| <i>Cl. perfringens</i>                      | No Ct    | No Ct  | No Ct    | No Ct  | No Ct    | No Ct  | No Ct      | No Ct  | No Ct  |
| <i>B. pilosicoli</i>                        | No Ct    | No Ct  | No Ct    | No Ct  | No Ct    | No Ct  | No Ct      | No Ct  | No Ct  |
| <i>B. hyodysenteriae</i>                    | No Ct    | No Ct  | No Ct    | No Ct  | No Ct    | No Ct  | No Ct      | No Ct  | No Ct  |
| Rotavirus A, GF3                            | No Ct    | No Ct  | No Ct    | No Ct  | No Ct    | No Ct  | No Ct      | No Ct  | No Ct  |
| Rotavirus B, sample 1                       | No Ct    | No Ct  | No Ct    | No Ct  | No Ct    | No Ct  | No Ct      | No Ct  | No Ct  |
| Rotavirus B, sample 2                       | No Ct    | No Ct  | No Ct    | No Ct  | No Ct    | No Ct  | No Ct      | No Ct  | No Ct  |
| Rotavirus C                                 | No Ct    | No Ct  | No Ct    | No Ct  | No Ct    | No Ct  | No Ct      | No Ct  | No Ct  |
| Rotavirus A/B/C/H                           | No Ct    | No Ct  | No Ct    | No Ct  | No Ct    | No Ct  | No Ct      | No Ct  | No Ct  |
| No template control                         | No Ct    | No Ct  | No Ct    | No Ct  | No Ct    | No Ct  | No Ct      | No Ct  | No Ct  |
| TGEV Purdue isolate 10 <sup>-3</sup>        | No Ct    | No Ct  | 26.9     | No Ct  | 27.1     | No Ct  |            |        |        |
| PEDV CV777 isolate 10 <sup>-1</sup>         | 28.2     | 28.1   | No Ct    | 27.9   | No Ct    | 28.1   |            |        |        |
| SeCoV S and N 10 <sup>4</sup> copies/μl     | No Ct    | 26.2   | 24.1     | 26.1   | No Ct    | 26.1   |            |        |        |
| PDCoV 10 <sup>6</sup> copies/μl             |          |        |          |        |          |        | 25.9       | No Ct  | No Ct  |
| TGEV N 10 <sup>5</sup> copies/μl            |          |        |          |        |          |        | No Ct      | 24.1   | No Ct  |
| PEDV N 10 <sup>5</sup> copies/μl            |          |        |          |        |          |        | No Ct      | No Ct  | 25.2   |

**Specificity panel and results from testing in the three separate duplex assays and in the triplex assay.** The samples included in the panel consisted of twenty pathogens other than PEDV, TGEV and SeCoV. The samples and the controls were tested on a single occasion. None of the samples were found positive apart from controls, when these were tested with the appropriate assays. Testing results that did not give Ct-values are indicated with grey shading.
