# Supplementary material for: Multiplex Real-Time RT-PCR Assays for Detection and Differentiation of Porcine Enteric Coronaviruses
Source: MDPI journal article supplement (doi:10.3390/pathogens12081040), 2023-08-14
Supplement: s1 [file s1]

**Supplementary Table S1**

|                  | Sequence 5' – 3'                                    | fragment size | Location                       | References |
|------------------|-----------------------------------------------------|---------------|--------------------------------|------------|
| PEDV and SeCoV S | TTCTGAGTCATGAACAGCCA<br>CATATGCAGCCTGCTCTGAA        | 651 bp        | 22,103-22,122<br>22,734-22,753 | [36]       |
| TGEV and SeCoV N | CAGCAACGCTCTCGTTC<br>CTTTGCCACTTCTGATGG             | 388 bp        | 27,541-27,557<br>27,910-27,928 | This Study |
| PDCoV RdRp       | GGAGCAGACAGGCCCGTCAGG<br>CAGGCTTTACACTTTATGCTTCCGGC | 446 bp        | pEX-F*<br>pEX-R**              |            |

**Sequences of the oligonucleotides used for amplifying fragments inserted into cloning vector to enable *In vitro* transcription of RNA standards.** The locations of the oligonucleotides in the genome are indicated relative to reference sequences: PEDV strain CV777 (Acc. no. NC\_003436) and TGEV strain Purdue (Acc. no. NC\_038861). \*pEX-F and \*\*pEX-R are oligonucleotides that bind to sequences located beside the multiple cloning site of the plasmid pEX-A2.
