# Supplementary material for: Multiplex Real-Time RT-PCR Assays for Detection and Differentiation of Porcine Enteric Coronaviruses
Source: MDPI journal article supplement (doi:10.3390/pathogens12081040), 2023-08-14
Supplement: s1 [file s1]

Supplementary Table S3

| No. | Pathogen        | Collected  | Duplex 1  |           | Duplex 2  |           | Duplex 3  |           | Triplex           |           |           |
|-----|-----------------|------------|-----------|-----------|-----------|-----------|-----------|-----------|-------------------|-----------|-----------|
|     |                 |            | PEDV<br>N | PEDV<br>S | TGEV<br>N | PEDV<br>S | TGEV<br>S | PEDV<br>S | PDCo<br>V<br>RdRp | TGEV<br>N | PEDV<br>N |
| 1   | PEDV            | 07-12-2007 | 21.7      | 21.9      | No Ct     | 21.8      | No Ct     | 22.5      | No Ct             | No Ct     | 21.7      |
| 2   | PEDV            | 12-01-2019 | 21.0      | 21.2      | No Ct     | 21.2      | No Ct     | 21.5      | No Ct             | No Ct     | 22.9      |
| 3   | PEDV            | 16-01-2019 | 21.5      | 21.4      | No Ct     | 21.2      | No Ct     | 21.8      | No Ct             | No Ct     | 23.5      |
| 4   | PEDV            | 21-01-2019 | 22.0      | 22.8      | No Ct     | 22.6      | No Ct     | 23.1      | No Ct             | No Ct     | 22.6      |
| 5   | PEDV            | 04-02-2019 | 16.5      | 17.9      | No Ct     | 17.7      | No Ct     | 17.9      | No Ct             | No Ct     | 17.6      |
| 6   | PEDV            | 12-02-2019 | 22.8      | 23.5      | No Ct     | 23.2      | No Ct     | 23.6      | No Ct             | No Ct     | 23.3      |
| 7   | PEDV            | 18-02-2019 | 19.2      | 20.3      | No Ct     | 20.4      | No Ct     | 20.4      | No Ct             | No Ct     | 20.6      |
| 8   | PEDV            | 21-02-2019 | 16.0      | 17.0      | No Ct     | 17.1      | No Ct     | 17.1      | No Ct             | No Ct     | 16.1      |
| 9   | PEDV            | 21-02-2019 | 18.1      | 18.8      | No Ct     | 18.6      | No Ct     | 19.0      | No Ct             | No Ct     | 18.7      |
| 10  | PEDV            | 05-03-2019 | 14.9      | 16.6      | No Ct     | 16.6      | No Ct     | 16.7      | No Ct             | No Ct     | 15.7      |
| 11  | PEDV            | 11-03-2019 | 21.2      | 23.2      | No Ct     | 23.0      | No Ct     | 23.2      | No Ct             | No Ct     | 22.0      |
| 12  | PEDV            | 14-03-2019 | 23.7      | 24.7      | No Ct     | 24.5      | No Ct     | 24.5      | No Ct             | No Ct     | 24.5      |
| 13  | PEDV            | 29-03-2019 | 22.2      | 22.0      | No Ct     | 22.1      | No Ct     | 22.1      | No Ct             | No Ct     | 23.5      |
| 14  | PEDV            | 02-04-2019 | 20.5      | 21.9      | No Ct     | 22.0      | No Ct     | 22.1      | No Ct             | No Ct     | 21.3      |
| 15  | PEDV            | 03-04-2019 | 19.1      | 20.5      | No Ct     | 20.8      | No Ct     | 20.8      | No Ct             | No Ct     | 20.1      |
| 16  | PEDV            | 11-04-2019 | 22.4      | 23.6      | No Ct     | 23.5      | No Ct     | 24.1      | No Ct             | No Ct     | 23.4      |
| 17  | PEDV            | 16-04-2019 | 25.3      | 25.3      | No Ct     | 25.3      | No Ct     | 25.8      | No Ct             | No Ct     | 26.3      |
| 18  | PEDV            | 10-05-2019 | 21.5      | 22.6      | No Ct     | 22.6      | No Ct     | 23.0      | No Ct             | No Ct     | 23.4      |
| 19  | PEDV            | 14-05-2019 | 15.2      | 17.6      | No Ct     | 17.6      | No Ct     | 17.7      | No Ct             | No Ct     | 16.4      |
| 20  | PEDV            | 29-05-2019 | No Ct     | 29.1      | No Ct     | 29.1      | No Ct     | 29.4      | No Ct             | No Ct     | No Ct     |
| 21  | PEDV            | 05-06-2019 | 17.5      | 18.9      | No Ct     | 18.9      | No Ct     | 19.0      | No Ct             | No Ct     | 19.2      |
| 22  | PEDV            | 06-06-2019 | 15.5      | 17.2      | No Ct     | 17.2      | No Ct     | 17.2      | No Ct             | No Ct     | 17.0      |
| 23  | PEDV            | 06-07-2019 | 26.8      | 27.7      | No Ct     | 27.6      | No Ct     | 27.7      | No Ct             | No Ct     | 27.7      |
| 24  | PEDV            | 02-09-2019 | 15.3      | 17.0      | No Ct     | 16.8      | No Ct     | 16.8      | No Ct             | No Ct     | 16.7      |
| 25  | Rec. SeCoV/PEDV | 15-03-2019 | 31.0      | 31.7      | No Ct     | 31.1      | No Ct     | 32.1      | No Ct             | No Ct     | No Ct     |
| 26  | Rec. SeCoV/PEDV | 18-03-2019 | 20.6      | 22.1      | No Ct     | 21.9      | No Ct     | 22.1      | No Ct             | No Ct     | 21.6      |
| 27  | Rec. SeCoV/PEDV | 20-03-2019 | 15.8      | 17.2      | No Ct     | 17.1      | No Ct     | 18.4      | No Ct             | No Ct     | 16.7      |
| 28  | Rec. SeCoV/PEDV | 21-03-2019 | 19.4      | 20.9      | No Ct     | 21.1      | No Ct     | 21.1      | No Ct             | No Ct     | 20.6      |
| 29  | Rec. SeCoV/PEDV | 25-03-2019 | 20.3      | 22.2      | No Ct     | 22.3      | No Ct     | 22.2      | No Ct             | No Ct     | 22.2      |
| 30  | Rec. SeCoV/PEDV | 25-03-2019 | 17.8      | 18.9      | No Ct     | 18.4      | No Ct     | 18.8      | No Ct             | No Ct     | 20.0      |
| 31  | Rec. SeCoV/PEDV | 25-03-2019 | 20.3      | 22.4      | No Ct     | 22.1      | No Ct     | 22.0      | No Ct             | No Ct     | 22.2      |
| 32  | Rec. SeCoV/PEDV | 28-03-2019 | 17.1      | 18.3      | No Ct     | 18.3      | No Ct     | 18.5      | No Ct             | No Ct     | 18.3      |
| 33  | Rec. SeCoV/PEDV | 29-03-2019 | 26.0      | 27.2      | No Ct     | 27.2      | No Ct     | 27.3      | No Ct             | No Ct     | 26.7      |
| 34  | Rec. SeCoV/PEDV | 03-04-2019 | 15.8      | 17.1      | No Ct     | 17.0      | No Ct     | 17.0      | No Ct             | No Ct     | 16.5      |
| 35  | Rec. SeCoV/PEDV | 04-04-2019 | 20.8      | 22.2      | No Ct     | 22.1      | No Ct     | 22.2      | No Ct             | No Ct     | 22.1      |
| 36  | Rec. SeCoV/PEDV | 17-04-2019 | 18.1      | 19.8      | No Ct     | 19.6      | No Ct     | 20.0      | No Ct             | No Ct     | 19.5      |
| 37  | Rec. SeCoV/PEDV | 19-04-2019 | 22.0      | 23.3      | No Ct     | 23.2      | No Ct     | 23.5      | No Ct             | No Ct     | 24.2      |

Continued Supplementary Table S3:

| No                                      | Pathogen        | Collected  | Duplex 1  |           | Duplex 2  |           | Duplex 3  |           | Triplex       |           |           |
|-----------------------------------------|-----------------|------------|-----------|-----------|-----------|-----------|-----------|-----------|---------------|-----------|-----------|
|                                         |                 |            | PEDV<br>N | PEDV<br>S | TGEV<br>N | PEDV<br>S | TGEV<br>S | PEDV<br>S | PDCoV<br>RdRp | TGEV<br>N | PEDV<br>N |
| 38                                      | Rec. SeCoV/PEDV | 03-05-2019 | 21.5      | 22.8      | No Ct     | 22.5      | No Ct     | 22.6      | No Ct         | No Ct     | 23.0      |
| 39                                      | Rec. SeCoV/PEDV | 05-05-2019 | 23.2      | 24.4      | No Ct     | 24.4      | No Ct     | 24.7      | No Ct         | No Ct     | 26.0      |
| 40                                      | Rec. SeCoV/PEDV | 23-05-2019 | 17.7      | 19.1      | No Ct     | 18.8      | No Ct     | 19.1      | No Ct         | No Ct     | 18.4      |
| 41                                      | Rec. SeCoV/PEDV | 19-06-2019 | 13.0      | 14.2      | No Ct     | 14.3      | No Ct     | 14.2      | No Ct         | No Ct     | 14.3      |
| 42                                      | Rec. SeCoV/PEDV | 01-07-2019 | 29.9      | 31.1      | No Ct     | 30.3      | No Ct     | 31.1      | No Ct         | No Ct     | No Ct     |
| 43                                      | Rec. SeCoV/PEDV | 24-07-2019 | 19.6      | 21.1      | No Ct     | 21.2      | No Ct     | 21.2      | No Ct         | No Ct     | 21.5      |
| 44                                      | Rec. SeCoV/PEDV | 06-08-2019 | 15.1      | 16.0      | No Ct     | 15.9      | No Ct     | 15.9      | No Ct         | No Ct     | 18.9      |
| 45                                      | Rec. SeCoV/PEDV | 19-09-2019 | 23.7      | 25.5      | No Ct     | 25.3      | No Ct     | 25.2      | No Ct         | No Ct     | 28.0      |
| 46                                      | Rec. SeCoV/PEDV | 20-09-2019 | 18.1      | 19.8      | No Ct     | 19.8      | No Ct     | 19.7      | No Ct         | No Ct     | 19.7      |
| 47                                      | SeCoV           | 22-12-2009 | No Ct     | 21.9      | 20.3      | 21.9      | No Ct     | 21.7      | No Ct         | 20.3      | No Ct     |
| 48                                      | SeCoV           | 29-12-2009 | No Ct     | 25.1      | 23.2      | 24.6      | No Ct     | 25.0      | No Ct         | 24.1      | No Ct     |
| 49                                      | SeCoV           | 29-12-2009 | No Ct     | 26.5      | 24.8      | 26.0      | No Ct     | 26.3      | No Ct         | 24.4      | No Ct     |
| 50                                      | SeCoV           | 29-12-2009 | No Ct     | 22.6      | 21.0      | 22.0      | No Ct     | 22.2      | No Ct         | 20.4      | No Ct     |
| 51                                      | SeCoV           | 29-12-2009 | No Ct     | 22.1      | 20.2      | 21.4      | No Ct     | 21.4      | No Ct         | 20.0      | No Ct     |
| 52                                      | SeCoV           | 03-02-2012 | No Ct     | 26.2      | 27.1      | 25.9      | No Ct     | 26.0      | No Ct         | 26.9      | No Ct     |
| 53                                      | SeCoV           | 15-03-2012 | No Ct     | 24.2      | 22.1      | 24.1      | No Ct     | 24.1      | No Ct         | 21.3      | No Ct     |
| 54                                      | SeCoV           | 27-12-2010 | No Ct     | 22.6      | 21.6      | 22.4      | No Ct     | 22.6      | No Ct         | 21.6      | No Ct     |
| 55                                      | SeCoV           | 04-03-2019 | No Ct     | 22.8      | 20.0      | 22.7      | No Ct     | 23.1      | No Ct         | 21.7      | No Ct     |
| No template control                     |                 |            | No Ct         | No Ct     | No Ct     |
| No template control                     |                 |            | No Ct         | No Ct     | No Ct     |
| TGEV Purdue isolate 10 <sup>-3</sup>    |                 |            | No Ct     | No Ct     | 26.4      | No Ct     | 26.4      | No Ct     |               |           |           |
| TGEV Purdue isolate 10 <sup>-3</sup>    |                 |            | No Ct     | No Ct     | 26.1      | No Ct     | 26.5      | No Ct     |               |           |           |
| PEDV CV777 isolate 10 <sup>-1</sup>     |                 |            | 27.6      | 28.0      | No Ct     | 28.1      | No Ct     | 28.4      |               |           |           |
| PEDV CV777 isolate 10 <sup>-1.6</sup>   |                 |            | 30.2      | 30.8      | No Ct     | 30.7      | No Ct     | 31.4      |               |           |           |
| SeCoV S and N 10 <sup>4</sup> copies/μl |                 |            | No Ct     | 26.1      | 23.4      | 25.8      | N.T.*     | N.T.*     |               |           |           |
| SeCoV S and N 10 <sup>4</sup> copies/μl |                 |            | No Ct     | 26.0      | 23.8      | 26.0      | No Ct     | 26.3      |               |           |           |
| PDCoV 10 <sup>6</sup> copies/μl         |                 |            |           |           |           |           |           |           | 25.3          | No Ct     | No Ct     |
| TGEV N 10 <sup>5</sup> copies/μl        |                 |            |           |           |           |           |           |           | No Ct         | 24.2      | No Ct     |
| PEDV N 10 <sup>4</sup> copies/μl        |                 |            |           |           |           |           |           |           | No Ct         | No Ct     | 22.7      |

\*N.T. = not tested

**Sensitivity testing for porcine alphacoronaviruses using the duplex and triplex assays.** A panel of 55 field samples of PEDV and SeCoV, including recombinant PEDV/SeCoVs, were tested in each of the multiplex assays. Ct values are shown. Testing results that did not give Ct-values are indicated with grey shading. Some of the control samples were tested in duplicate where indicated.
